# Supplementary material
Source: PubMed Central journal article supplement (PMC2311327)
Supplement: 0709698105_Supplemental_PDF.pdf [file 0709698105_Supplemental_PDF.pdf]

# Supporting Information

Kalendar et al. 10.1073/pnas.0709698105

## Supporting Text

### SI Methods

**Plant Material.** Leaves of *Nephrolepis exaltata*, *Sphaeropteris cooperi* (*Cyathea cooperi*), *Lotus corniculatus* L., *Medicago truncatula* Gaertner (var. *longeaculeata* Urban), and *Mesembryanthemum crystallinum* L. were gifts of the Gardenia (Helsinki, Finland) and of the University of Helsinki Botanic Garden. Leaves of *Prunus domestica* L., *Malus domestica* Borkh., *Chaenomeles japonica* Lindl. ex Spach, *Rubus idaeus* L., cv. "Muskoka," and cv. "Jatsi," *Rosa hybrida*, *Rosa rugosa* Thunb., and *Fragaria x ananassa* Royer were from the MTT Agrifood Research Finland collection. Seeds of *Glycine max* (L.) Merr. and heads of *Brassica oleracea* L. (cabbage) were purchased locally. *Solanum tuberosum* L. plants were a gift of Veli-Matti Rokka (MTT Agrifood Research Finland, Biotechnology and Food Research). Seeds of *Brassica napus* L., *B. napa*, and *Phleum pratense* were gifts of Boreal Plant Breeding Ltd.. Seeds of *Arabidopsis thaliana*, ecotype Columbia, were from the Arabidopsis Biological Resource Center, Ohio State University. Seeds for various members of the Poaceae (*Bromus sterilis*, *Agropyron cristatum*, *Amblyopyrum muticum*, *Australopyrum retrofractum*, *Australopyrum velutinum*, *Comopyrum comosum*, *Crithodium monococcum*, *Crithopsis delileana*, *Dasyopyrum vilosum*, *Eremopyrum distans*, *Eremopyrum triticeum*, *Festucopsis serpentinii*, *Henrardia persica*, *Heterantherium piliferum*, *Hordeum brachyantherum* ssp. *californicum*, *Hordeum erectifolium*, *Hordeum marinum* ssp. *Gussoneanum*, *Hordeum murinum* ssp. *Glaucum*, *Hordeum vulgare* ssp. *spontaneum*, *Lophopyrum elongatum*, *Peridictyon sanctum*, *Psathyrostachys fragilis* ssp. *fragilis*, *Psathyrostachys fragilis* ssp. *villosus*, *Psathyrostachys stoloniformis*, *Pseudoroegneria spicata*, *Taeniatherum caput-medusae*, *Trinopyrum bessarabicum*, *Elymus repens*, *Hordeum patagonicum*, *Aegilops speltoides* var. *speltoides*, *Aegilops tauschii* var. *meyeri*, *Triticum aestivum*, *Triticum durum*, *Secale strictum*, *Secale cereale*, *Oryza sativa*, *Avena sativa*, *Sorghum vulgare*) were gifts of Ole Seberg (Institute of Biology, University of Copenhagen). *Spartina alterniflora* was a gift of Malika Ainouche (University of Rennes). *Zea mays* was a gift of Pioneer Hi-Bred International.

**Cloning of RNA Polymerase III Transcripts by RT-PCR.** Total RNA was extracted from leaves (barley cv Kymppi), and treated with DNase I (DNA-free; Ambion). A RACE RNA adaptor (taken from the FirstChoice® RLM-RACE kit, product 1700; Ambion) was ligated to the ends of the RNAs to allow amplification. The 50- $\mu$ l ligation reaction contained: 1 $\times$  T4 RNA ligase buffer [33 mM Tris-acetate (pH 7.8) (25°C), 66 mM sodium acetate, 10 mM MgCl<sub>2</sub>, 0.5 mM DTT, 1 mM ATP], 50 units of RNasin, 5 mg of DNA-free total barley RNA, 5 mg of RACE RNA adaptor, 25 units of T4 RNA Ligase (Epicentre). The reaction was carried out for 1 hour at 37°C. The cDNA was synthesized by reverse transcription in a 50- $\mu$ l reaction containing: 1 $\times$  M-MuLV reverse-transcriptase buffer [50 mM Tris-HCl (pH 8.3) (25°C), 50 mM KCl, 4 mM MgCl<sub>2</sub>, 10 mM DTT, 1 mM dNTP], 50 units of RNasin, 20  $\mu$ l of ligated RNA from the previous step, 6  $\mu$ M 16-mer random primers, 500 units of RevertAid M-MuLV Reverse Transcriptase (Fermentas). The reaction was carried out for 1 hour at 42°C.

This was followed by two stages of nested RT-PCR. In the first stage, a 50- $\mu$ l reaction mix was prepared, containing: 5  $\mu$ l of cDNA from the previous step, 1 $\times$  PCR buffer [75 mM Tris-HCl (pH 8.8), 20 mM (NH<sub>4</sub>)<sub>2</sub>SO<sub>4</sub>, 1.5 mM MgCl<sub>2</sub>, 0.01% Tween-20],

200  $\mu$ M dNTP, 2.7 units of *Taq* polymerase, 200 nM RNA-adaptor primer (RACE, 5'-GCTGATGGCGATGAATGAA-CACTG-3'), 20 nM LTR primer (for barley, primer A113: 5'-TGTAACGCCCGGACACACC-3', matching nucleotides 245–265 from the 5' end of the *Cassandra* LTR). The amplification was carried out by using the following program: 94°C for 4 min, 30 cycles of 94°C for 40 sec, 55°C for 40 sec, 72°C for 30 sec and a final elongation at 72°C for 5 min. After the reaction, the mixture was diluted with 200  $\mu$ l of TE to a final volume of 250  $\mu$ l.

The second-stage RT-PCR mix of 50  $\mu$ l contained: 5  $\mu$ l from the diluted first-stage reaction, 1 $\times$  PCR buffer [75 mM Tris-HCl (pH 8.8), 20 mM (NH<sub>4</sub>)<sub>2</sub>SO<sub>4</sub>, 1.5 mM MgCl<sub>2</sub>, 0.01% Tween-20], 200  $\mu$ M dNTP, 2.7 units of *Taq* polymerase, 200 nM RNA adaptor primer (RACE, 5'-GCTGATGGCGATGAATGAA-CACTG-3'), 20 nM 5S RNA primer (for barley, primer 1,181: 5'-GGAGCAACTTCCCCGGTCGGTCA-3', located 129–151 nt from the 5' end of the *Cassandra* LTR). The amplification was carried out with a program consisting of 94°C for 4 min; 25 cycles of 94°C for 40 sec, 55°C for 40 sec, 72°C for 30 sec, and a final elongation at 72°C for 5 min.

**Determination of *Cassandra* 5S RNA Transcript Ends.** Total barley RNA was treated with calf intestinal phosphatase (CIP) to remove the free 5' phosphates from all noncapped RNA (rRNA, fragmented mRNA, tRNA) and remaining genomic DNA. The cap structure of mRNAs was then removed with tobacco acid pyrophosphatase (TAP) to produce a 5' monophosphate. A 45-nt RNA adaptor oligonucleotide (supplied with the kit) was ligated to the mRNA by using T4 RNA ligase. The product was amplified with the one-step RT-PCR method as described above. The first round of amplifications was made with a primer complementary to the RNA adaptor (5'-GCTGATGGCGATGAATGAACTG-3') and a reverse primer matching the PBS motif of the *Cassandra* (5'-ACCGCGAGGGTCGGCTCTGAT-ACCA-3') under the conditions recommended by the manufacturer. The product was then diluted 10 times, and a second round of amplification carried out with the RACE primer and a reverse primer matching the LTR (5'-TTGTCTCACTCATGCG-CACC-3') similar to the nested amplifications described above. The reaction was carried out as described above but with the following program: an initial denaturation at 94°C for 4 min, 25 cycles of 94°C for 40 sec, 57°C for 40 sec, and 72°C for 30 sec. Products were isolated from the gel, cloned into the pGEM-T vector, and sequenced.

**EST Database Searches.** The EST searches were run locally by Blastn on the EST\_others database (GenBank 16.09.2007, 32, 565,588 sequences and 18,466,006, 241 nt), which includes nonmouse and nonhuman accessions. A cut-off e-value score of 0.001 was used. Taxonomy information for EST matches was derived from the taxdb databases, which were downloaded from ftp://ftp.ncbi.nih.gov/blast/db.

**Prediction of Secondary Structure for *Cassandra* 5S RNA.** The web interface of "alifold" (www.tbi.univie.ac.at/~ivo/RNA/alifoldcgi.html) in the Vienna Package (www.tbi.univie.ac.at/~ivo/RNA/) was used to visualize the consensus structure of both cellular and *Cassandra* 5S RNA. A total of 43 5S rRNAs from the 5S rRNA database (http://rose.man.poznan.pl/5SData/) were analyzed. The default settings of the Vienna package were used except for 17°C instead of 37°C as the folding

temperature, a choice reflecting the plant origin of the sequences. The RNAz program of the Vienna package was used to test the probability of functionality of predicted secondary structures. Sequences were analyzed in the reverse orientation as a control.

**Determination of Information Content in *Cassandra* 5S RNA.** Two nonredundant libraries of DNA sequences were used for alignment by ClustalW software ([www.ebi.ac.uk/Tools/clustalw/index.html](http://www.ebi.ac.uk/Tools/clustalw/index.html)) (1): 45 sequences of *Cassandra* 5S RNA and 11 sequences of cellular 5S rRNA. Sequence conservation of the DNA sequence was calculated as the information contribution of each base relative to its expected distribution, as previously (2). RNA secondary structures were predicted for each of the sequences with the Vienna package (3). The outputs were aligned by using the DNA multiple alignments as a guide. The conservation of RNA secondary structure at every position was computed as the information contribution of stem or loop relative to their expected distribution as before (2). The procedure was repeated for RNA structures predicted from randomized sequences shuffled along the length of each sequence. To compare the conservation of the RNA secondary structures of *Cassandra* to cellular 5S rRNA sequences, the two datasets of RNA secondary structure information content were plotted together (Fig. S3).

## SI Results

**Features of *Cassandra* Elements.** We have assembled general features of the sequenced *Cassandra* elements in Table S2. Retrotransposon LTRs serve as promoters for transcription by RNA polymerase II and contain termination and polyadenylation signals. The long terminal inverted repeats (TIRs) in the Rosaceae and Brassicaceae are unusual; 5- to 6-nt TIRs are commonly found in retrotransposons such as *BARE1* (4). *Cassandra* integration generates target site duplications (TSDs) as does that of other retroelements (Table S5). The 5S RNA is not symmetrically situated within the LTR. In the ferns, which have the shortest LTRs found, the 5S RNA region is at the 3' end of the LTR. In the flowering plants, it tends to be found closer to the 5' end of the LTR.

**5S RNA in *Cassandra* LTRs.** The alignments for nucleotides 40–120 of the 5S RNA region (Fig. S2 and Table 3) show 77.5% (*Brassica oleracea*) to 90.8% (*Arabidopsis thaliana*) identity to the species' corresponding 5S rRNA but only 55.6–65.7% similarity when the entire 5S RNA region is aligned without gaps. The *Cassandra* elements show still higher conservation in the region corresponding to the RNA polymerase III promoter, which begins at nucleotide 51 of the alignment. Of the several types of RNA polymerase III promoters, which differ from the polymerase II promoters of most cellular genes by their position within the transcribed region, that of *Cassandra* resembles the 5S rRNA promoter rather than the tRNA promoters (5). The promoters for RNA polymerase III are multipartite. The A-Box (AGTTA-AGCGTGC) is found at nucleotides 51–60, the Intermediate Element (GA) at nucleotides 71–72, and the C-Box (AGGAT-GGGTG) at nucleotides 81–91. In addition, the alignment shows a GGAAGT motif between nucleotides 98 and 104 that is completely conserved between *Cassandra* and cellular 5S RNAs.

In *Arabidopsis*, additional motifs have been defined that are important for polymerase III transcription of 5S rRNA (6). A C at –1 nt from the *Arabidopsis* transcriptional start is conserved in all *Cassandra* LTRs 1 nt upstream of the aligned 5S RNA region excepting the three fern species we have investigated. A TATA box at nucleotides –23 to –28, which directs transcriptional reinitiation in *Arabidopsis* (6, 7), can be found at nucleotides 25–28 in the LTRs of *Cassandra* from the Rosaceae; the other families show A/T stretches at nucleotides –25 to –28 but

not the canonical TATA. Alignments of the *Cassandra* LTRs, however, all fail to show the short motif previously described as the RNA polymerase III stop signal, a G/C pair, followed by four or more T nucleotides (6, 8).

***Cassandra* Transcription.** We used RT-PCR to detect *Cassandra* transcription by polymerase II (Fig. 1C), followed by sequencing of the products (data not shown). The products span from LTR to LTR. A 50-nt-shorter product represents either a well transcribed deletion or an artifact from secondary structure in the transcript. The RLM-RACE method was used with primers specific to the *Cassandra* 5S RNA domain to produce products specific to the polymerase III promoter internal to the 5S RNA domain. Sequencing enabled us to determine that these subgenomic transcripts from the TRIM element are present. The transcripts start specifically at an A nucleotide, unlike general 5S rRNAs. Furthermore, using an RLM-RACE RT-PCR method specific to the 5' end structure, we were able to establish that the *Cassandra* subgenomic 5S RNAs are uncapped, as expected from the polymerase III promoter, and do not result from polymerase II transcription.

We also carried out EST database searches with the initial 40 nt of the 5S domain, which is specific to *Cassandra*, with the first 40 nt of the LTR, which excludes the 5S domain, and with the internal domain, which provides a discriminator of full-length *Cassandra* elements from *Cassandra* LTRs. Matching EST accessions (Table S4) include many that carry *Cassandra* full-length or solo-LTR insertions. This is unusual for retrotransposon insertions, particularly in the cereals, where retrotransposons tend to nest in intergenic regions (9–12). For comparison, our searches of the rice EST database with retrotransposon *Tos17* (accession no. D88393) of rice, which shows a strong preference towards genic sites for new insertions mobilized by tissue culture (13), reveals no elements inserted into cellular ESTs in normal nonmutagenized lines. We have also looked for insertions of *Osr3-1* (AF458765), *Osr38-1* (AF458766), *Osr39-1* (AF458767), and *Osr42-1* (AF458768), also low-copy elements of rice (14), and likewise found no insertions into cellular ESTs. Searches of the rice whole-genome database, annotated by compartment, yields a picture consistent with that from the EST database. A total of 58 *Cassandra* out of 352, or 16% of the total in the rice genome, are within genes, although only 4 of these, or 1%, are within exons.

**Secondary Structure Predictions for *Cassandra* 5S RNA.** The canonical structure of 5S rRNA is a T-shaped hairpin of five loops and five helices (15). However, the accuracy of predictions of this secondary structure for 5S rRNA from various sources can vary between 0 and 100%, with not all predicted structures resembling the canonical one (16, 17). We carried out structural predictions for each *Cassandra* 5S RNA region and 5S rRNA in our alignment (Fig. 3).

The prediction for the 5S RNA of *Zea mays*, *Triticum aestivum*, *Citrus limon*, and *Ginkgo biloba* matched the canonical structure, as did the *Cassandra* 5S RNA of members of the Rosaceae, *Chaenomeles japonica*, *Prunus domestica*, and *Rosa hybrida*. Alternative cellular structures were predicted for the other cellular 5S rRNA and *Cassandra*, and fell into several distinct groups. The *Cyathea cooperi* *Cassandra* 5S sequence resembled the 5S rRNA of *Metasequoia glyptostroboides*, *Spinacea oleracea*, and *Brassica napus*. The *Lactuca sativa* 5S rRNA was predicted to as a hairpin structure; similar forms were predicted for *Cassandra* products from *Avena sativa*, *Brassica oleracea*, *Spartina alterniflora*. The modeled products of many *Cassandra*, primarily from the Poaceae, fall into two internally highly similar groups, typified by *Oryza sativa* and *Hordeum vulgare* (Fig. 3). Although the accuracy of the models cannot be estimated without crystallographic data, at least some of the of the

predicted *Cassandra* 5S RNA products do resemble canonical 5S rRNA structures.

**Cassandra copy number in the sequenced rice genome.** Chromosome-sized contiguous regions of the rice genome (18), which are referred to as pseudochromosomes or pseudomolecules, have been assembled. These allow nonredundant searches for sequence similarities. The *Cassandra* LTR, internal region, and entire element were used as query strings to search the rice genome. The results (Table S6) show a total of 352 elements in the rice genome, of which 76% are solo LTRs. Of these, 16% are within genes. Of the intact elements, which are those that contain two LTRs and an internal domain, 21% are within genes,

whereas 15% of the solo LTRs are found in this compartment. By comparison, in rice lines where *Tos17* has been induced to integrate at high levels (13), 11% of the insertions were within exons, and 9% within introns, for a total of 20% (70.4% of the insertion sites could not be characterized). The difference between the relative distribution into exons for *Tos17* and *Cassandra* can be correlated with the mutagenicity of *Tos17* and, in turn, with its somatic inactivity. Consistent with this, *Tos17* is found in only one to five copies in unmutagenized rice lines and cultivars, whereas *Cassandra* elements are in the hundreds. Hence, *Cassandra* is able to insert into noncoding regions of genes apparently without being mutagenic.

1. Thompson JD, Higgins DG, Gibson TJ (1994) *Nucleic Acids Res* 22:4673–4680.
2. Peleg O, Brunak S, Trifonov EN, Nevo E, Bolshoy A (2002) *AIDS Res Hum Retroviruses* 18:867–878.
3. Hofacker IL, et al. (1994) *Monatshfte Chemie* 125:167–188.
4. Suoniemi A, Schmidt D, Schulman AH (1997) *Genetica* 100:219–230.
5. Schramm L, Hernandez N (2002) *Genes Dev* 15:2593–2620.
6. Cloix C, Yukawa Y, Tutois S, Sugiura M, Tourmente S (2003) *Plant J* 35:251–261.
7. Yukawa Y, Sugita M, Choisine N, Small I, Sugiura M (2000) *Plant J* 22:439–447.
8. Hallenberg C, Frederiksen S (2001) *Biochim Biophys Acta* 1520:169–173.
9. Shirasu K, Schulman AH, Lahaye T, Schulze-Lefert P (2000) *Genome Res* 10:908–915.
10. SanMiguel P, Gaut BS, Tikhoniv A, Nakajima Y, Bennetzen JL (1998) *Nat Genet* 20:43–45.
11. Rostocks N, et al. (2002) *Funct Integr Genomics* 2:51–59.
12. Wei F, Wing RA, Wise RP (2002) *Plant Cell* 14:1903–1917.
13. Miyao A, et al. (2003) *Plant Cell* 15:1771–1780.
14. McCarthy EM, Liu J, Lizhi G, McDonald JF (2002) *Genome Biol* 3:research0053.1–0053.11.
15. Szyman'ski M, Barciszewska MZ, Erdmann VA, Barciszewski J (2003) *Biochem J* 371(Pt 3):641–651.
16. Mathews DH (2005) *Bioinformatics* 21:2246–2253.
17. Mathews DH, et al. (2004) *Proc Natl Acad Sci USA* 101:7287–7292.
18. International Rice Genome Sequencing Project (2005) *Nature* 436:793–800.
19. Wicker T, et al. (2007) *Nat Rev Genet* 8:973–982.
20. Kalendar R, et al. (2004) *Genetics* 166:1437–1450.
21. Jiang N, et al. (2002) *Genetics* 161:1293–1305.
22. Jiang N, Jordan IK, Wessler SR (2002) *Plant Physiol* 130:1697–1705.

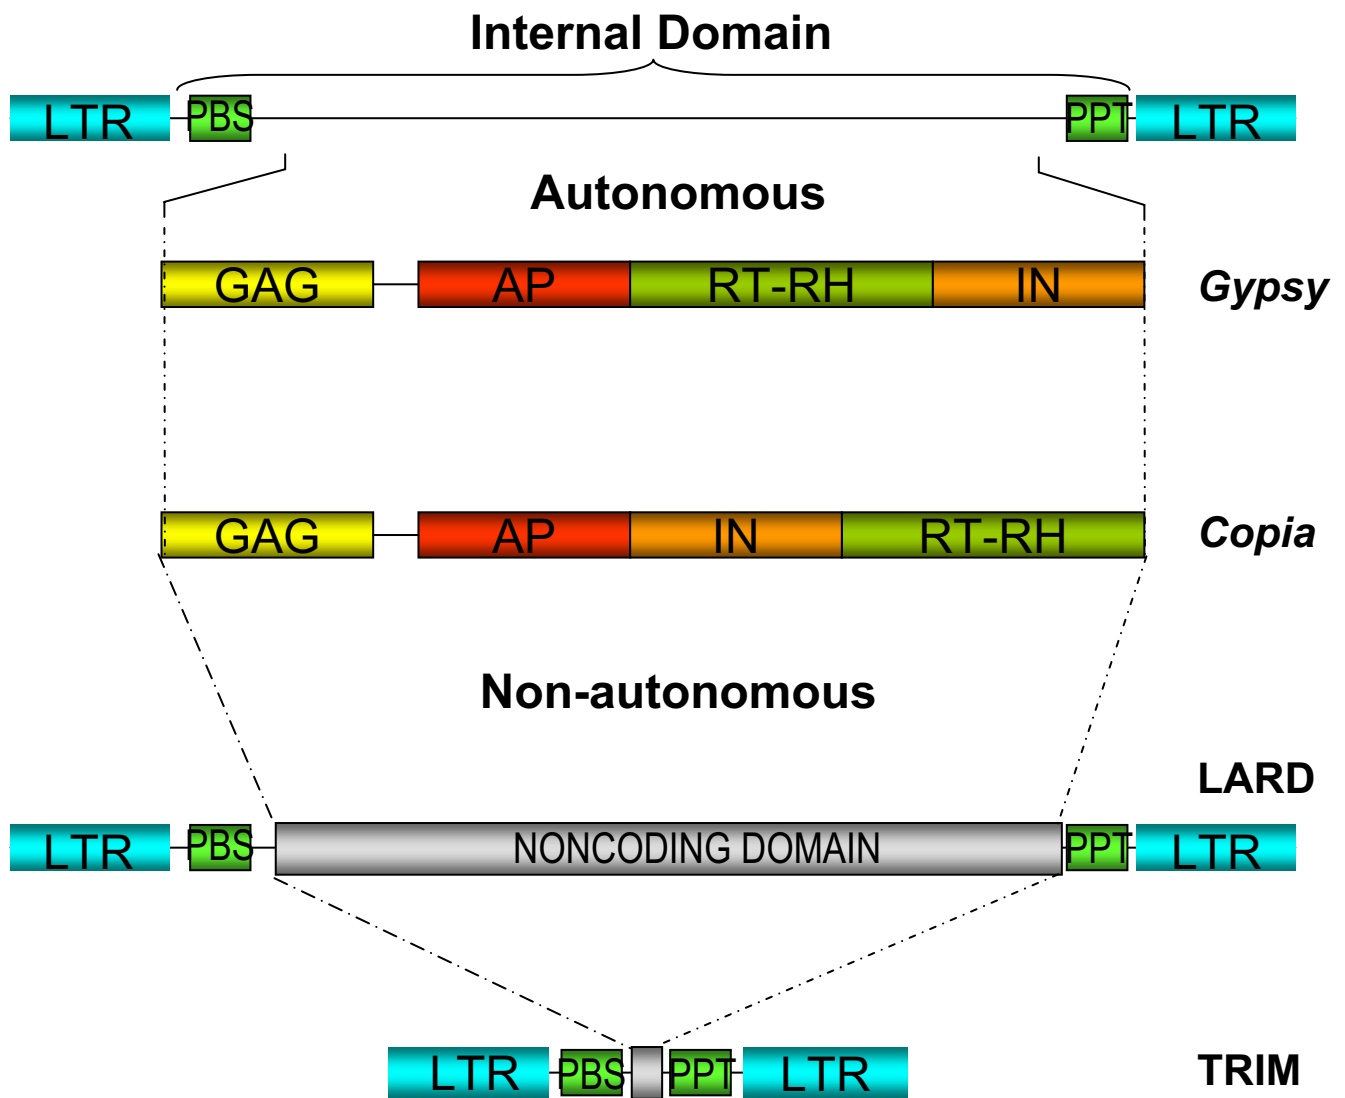

**Fig. S1.** Retrotransposon organization. (A) Retrotransposons of the *Copia* and *Gypsy* Superfamilies (19). The long terminal repeats (LTRs) are flanked internally by the primer binding site (PBS) (*Left*) and polypurine tract (PPT) (*Right*), which serve respectively as the priming sites for (–)-strand and (+)-strand cDNA synthesis by reverse transcriptase. Normally, two ORFs are encoded, one for Gag, the structural protein that forms the virus-like particle. The second encodes a polyprotein that is later cleaved into function domains specifying: AP, aspartic proteinase, which cleaves the polyprotein into functional units; IN, integrase, which inserts the cDNA copy into the genome; RT, reverse transcriptase, which copies the RNA transcript into cDNA; RNaseH, which digests the template during reverse transcription and thereby provides fragments that serve as the (+)-strand primer. The domain order differs in *Copia* and *Gypsy* elements. (B) Nonautonomous elements. LARDs contain long noncoding core domains that are conserved in secondary structure (20–22). TRIMs have very short LTRs and also short internal domains. *Cassandra* belongs to the TRIM group of retroelements.

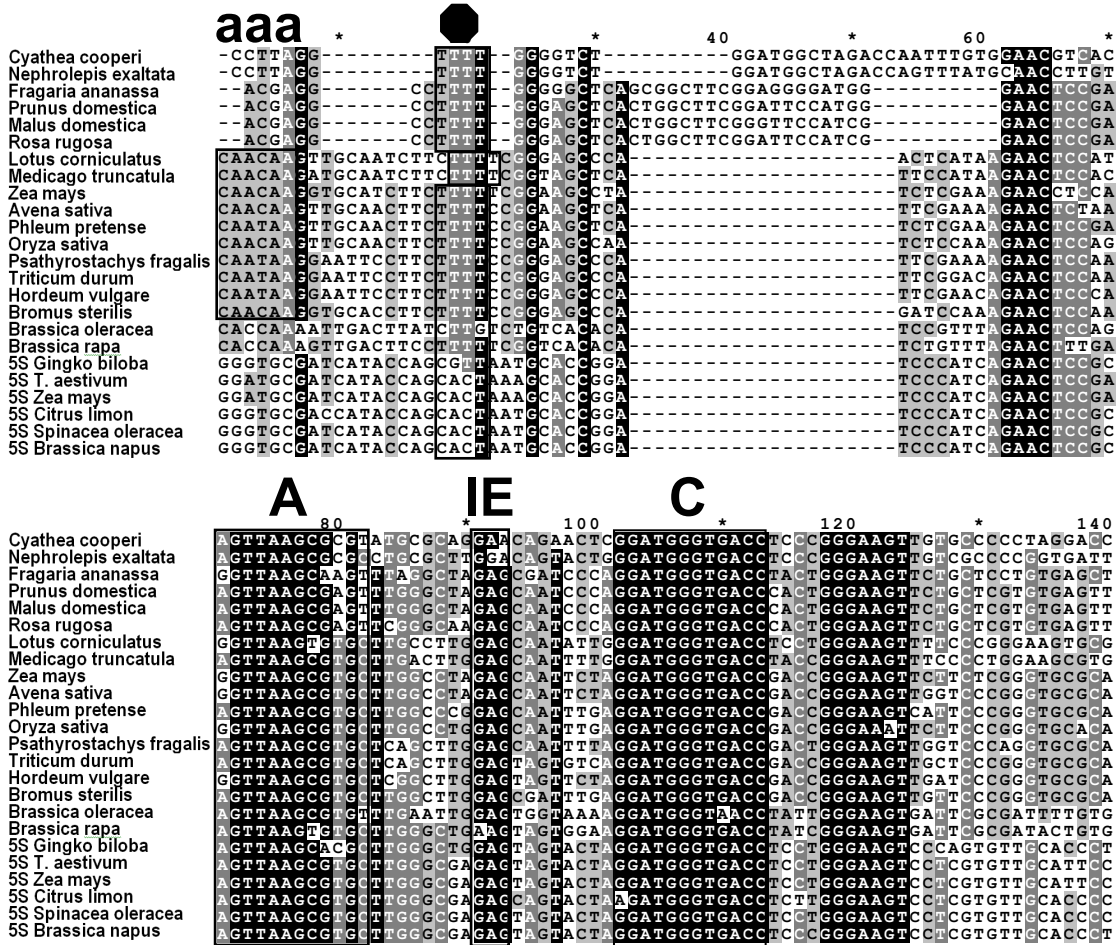

Fig. S2. Alignment of *Cassandra* 5S regions with cellular 5S rRNAs. Nucleotides are shaded according to the proportion that are identical at each position in the alignment: white on black,  $\geq 90\%$ ; white on gray,  $\geq 70\%$ ; black on gray,  $\geq 50\%$ ; black on white,  $< 50\%$ . Elements that have been identified as important for transcription (5, 6, 8) are labeled: A-Box; IE, Intermediate Element; C-Box. The predicted pol III terminator is marked as a black octagon, and the putative polyadenylation signal as “aaa.” This alignment was used for the phylogenetic prediction shown in Fig. 2. The accessions are organized by plant family.

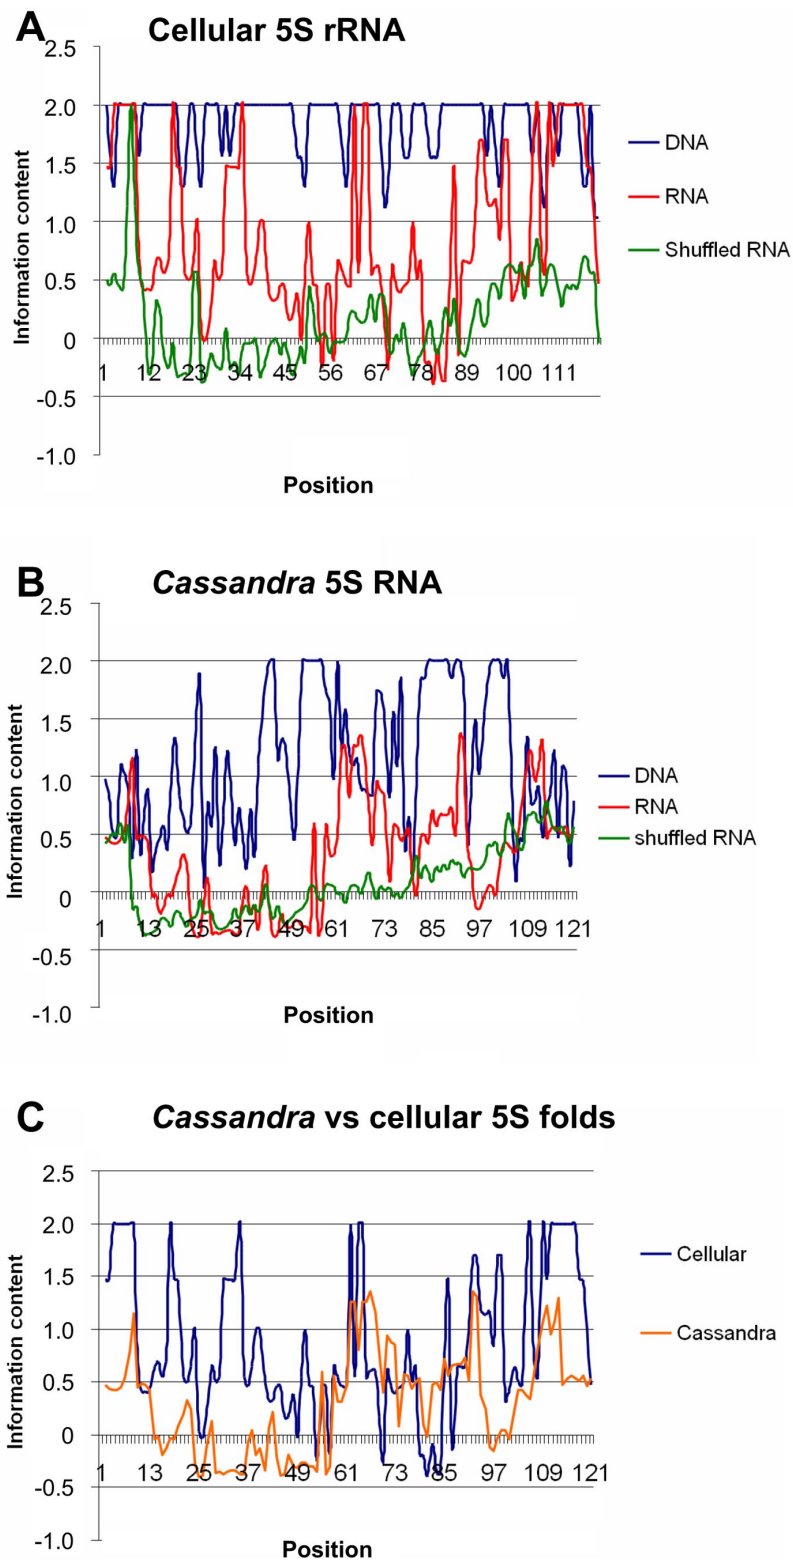

**Fig. S3.** Information content in *Cassandra* and cellular 5S RNA. Information content is plotted as a function of the position in alignments of *Cassandra* and cellular 5S sequences and in their predicted secondary structures. (A) Information content in cellular 5S rRNA sequences (DNA), secondary structures (RNA), and in the secondary structures after shuffling of each aligned sequence (shuffled RNA). (B) *Cassandra* 5S RNA. Details as for A. (C) Comparison at each aligned position of the information content in *Cassandra* and cellular 5S secondary structure.

**Table S1. Plants investigated**

Division: Pteridophyta (ferns):  
 Class: Filicopsida  
 Order: Polypodiales  
 Family: Dryopteridaceae  
*Didymochlaena truncatula*  
*Nephrolepis exaltata*  
 Family: Cyatheaceae  
*Sphaeropteris cooperi* (*Cyathea cooperi*)

Division: Magnoliophyta (flowering plants)  
 Class: Magnoliopsida, Dicotyledons  
 Subclass: Dilleniidae  
 Order: Salicales  
 Family: Salicaceae-willow family  
*Populus balsamifera* L. ssp. *trichocarpa*  
*Populus tremula* L.

Subclass: Magnoliids  
 Order: Piperales  
 Family: Aristolochiaceae  
*Saruma henryi* Oliv

Subclass: Rosidae  
 Order: Rosales  
 Family: Rosaceae  
*Prunus domestica* L.  
*Malus domestica* Borkh.  
*Chaenomeles japonica* Lindl. ex Spach  
*Rosa hybrida*  
*Rosa rugosa* Thunb.  
*Rubus idaeus* L.  
 cv. "Muskoka"  
 cv. "Jatsi"  
*Fragaria x ananassa* Royer

Order: Linales  
 Family: Linaceae  
*Linum usitatissimum* L.

Order: Fabales  
 Family: Fabaceae  
*Lotus corniculatus* L.  
*Medicago truncatula* Gaertner  
*Glycine max* (L.) Merr.  
*Pisum sativum* L.  
*Robinia pseudoacacia* L.

Subclass: Asteridae  
 Order: Solanales  
 Family: Solanaceae (potato family)  
*Solanum tuberosum* L.

Subclass: Dilleniidae  
 Order: Capparales  
 Family: Brassicaceae (mustard family)  
*Brassica rapa* L.  
*Brassica oleraceae* L.  
*Arabidopsis thaliana*

Order: Ericales  
 Family: Ericaceae  
*Vaccinium corymbosum* L.

Subclass: Caryophyllidae  
 Order: Caryophyllales  
 Family: Aizoaceae  
*Mesembryanthemum crystallinum* L.

Class: Liliopsida, Monocotyledons  
 Subclass: Zingiberidae  
 Order: Zingiberales  
*Zingiber officinale* Roscoe

Subclass: Commelinidae  
 Order: Cyperales  
 Family: Poaceae (grass family)

---

*Bromus sterilis*, *Agropyron cristatum*, *Amblyopyrum muticum*, *Australopyrum retrofractum*, *Australopyrum velutinum*, *Comopyrum comosum*, *Crithodium monococcum*, *Crithopsis delileana*, *Dasyphyrum vilosum*, *Eremopyrum distans*, *Eremopyrum triticeum*, *Festucopsis serpentinii*, *Henrardia persica*, *Heteranthelium piliferum*, *Hordeum brachyantherum* ssp. *californicum*, *Hordeum erectifolium*, *Hordeum marinum* ssp. *Gussoneanum*, *Hordeum murinum* ssp. *Glaucum*, *Hordeum vulgare* ssp. *spontaneum*, *Lophopyrum elongatum*, *Peridictyon sanctum*, *Psathyrostachys fragilis* ssp. *fragilis*, *Psathyrostachys fragilis* ssp. *villosus*, *Psathyrostachys stoloniformis*, *Pseudoroegneria spicata*, *Taeniatherum caput-medusae*, *Trinopyrum bessarabicum*, *Elymus repens*, *Hordeum patagonicum*, *Aegilops speltoides* var. *speltoides*, *Aegilops tauschii* var. *meyeri*, *Triticum aestivum*, *Triticum durum*, *Secale strictum*, *Secale cereale*, *Spartina alterniflora*, *Oryza sativa*, *Avena sativa*, *Zea mays* var. *B73 X MO17*, *Sorghum vulgare*, *Eragrostis tef*, *Brachypodium distachion*, *Saccharum officinarum* L.

---

Plants from which *Cassandra* retrotransposons were identified in this study. The classification scheme is according to the "Plants Classification" online system maintained by the U.S. Department of Agriculture ([http://plants.usda.gov/cgi\\_bin/topics.cgi?earl = plant\\_profile.cgi&symbol = BROL](http://plants.usda.gov/cgi_bin/topics.cgi?earl = plant_profile.cgi&symbol = BROL)).





| Species                         | Accession no. | LTR size, bp | 5S rRNA location in LTR, nt | TIR 5'-TG. . . CA-3' |         | Internal domain, bp | Sequence between LTR and PBS | PPT sequence    |
|---------------------------------|---------------|--------------|-----------------------------|----------------------|---------|---------------------|------------------------------|-----------------|
| <i>Eremopyrum distans</i>       | AY603372      | 244–264      | 42–162                      | TGtga                | ttaCA   | 198                 | AGT,AG                       | TGAGTGGGGGTGT   |
| <i>Psathyrostachys fragilis</i> | AY271962      | 268          | 42–162                      | TGtga                | ttaCA   | 195                 | AGT                          | GAGTGGGGGTGTA   |
| <i>Triticum aestivum</i>        | AY271963      | 267–272      | 42–162                      | TGtga                | ttaCA   | 195–196             | AGT                          | GAGTGGGGGTGTA   |
| <i>Henrardia persica</i>        | AY603374      | 264          | 42–162                      | TGtga                | ttaCA   | 198                 | AGT                          | AAGTGGGGGTGTA   |
| <i>Hordeum vulgare</i>          | AY164585      | 240–264      | 42–162                      | TGtga                | ttaCA   | 196–197             | AGTT,AGT                     | GAGTGGTGGTGTGTA |
| <i>Hordeum marinum</i>          | AY603375      | 264          | 42–162                      | TGtga                | ttaCA   | 196                 | AGT,AT                       | GAGTGGCGGTGTA   |
| <i>Hordeum brachyantherum</i>   | AY603373      | 264          | 42–162                      | TGtgatag             | cattaCA | 196                 | AGT,AT,AA                    | AGGTGGGGGTGTA   |

Properties of the cloned *Cassandra* elements from seed plants. A range of lengths is given for the long terminal repeat (LTR) where database sequences or cloned examples varied. The nucleotide at which the 5S RNA domain begins and ends is listed. The terminal inverted repeat (TIR) refers to the ends of the LTR. The internal domain includes the primer binding site (PBS) and polypurine tract (PPT) as well as the intervening segment. The question mark denotes current lack of a complete sequence.

**Table 3. *Cassandra* and 5S RNA comparisons**

| Genus and species               | Aligned segment of 5S rRNA region, % |                    |
|---------------------------------|--------------------------------------|--------------------|
|                                 | Entire, ungapped                     | Nucleotides 40–100 |
| <i>Hordeum vulgare</i>          | 61.7                                 | 85.4               |
| <i>Hordeum marinum</i>          | 61.7                                 | 85.4               |
| <i>Henrardia persica</i>        | 59.6                                 | 82.1               |
| <i>Secale cereale</i>           | 60.2                                 | 83.3               |
| <i>Amblyopyrum muticum</i>      | 60.8                                 | 84.6               |
| <i>Triticum durum</i>           | 60.4                                 | 83.8               |
| <i>Eremopyrum distans</i>       | 57.7                                 | 79.2               |
| <i>Psathyrostachys fragalis</i> | 59.8                                 | 83.3               |
| <i>Hordeum brachyantherum</i>   | 60.2                                 | 85.4               |
| <i>Bromus sterilis</i>          | 59.8                                 | 81.7               |
| <i>Peridictyon sanctum</i>      | 57.3                                 | 79.2               |
| <i>Phleum pratense</i>          | 62.9                                 | 83.8               |
| <i>Avena sativa</i>             | 61.7                                 | 85.8               |
| <i>Zea mays</i>                 | 61.8                                 | 84.2               |
| <i>Oryza sativa</i>             | 59.8                                 | 80.8               |
| <i>Spartina alterniflora</i>    | 57.7                                 | 80                 |
| <i>Nephrolepis exaltata</i>     | 56.5                                 | 78.3               |
| <i>Didymochlaena truncata</i>   | 56.7                                 | 80.4               |
| <i>Cyathea cooperi</i>          | 55.8                                 | 80.8               |
| <i>Rubus idaeus</i>             | 63.3                                 | 80.8               |
| <i>Rosa hybrid</i>              | 65.6                                 | 83.3               |
| <i>Chaenomelesomeles</i>        | 67.7                                 | 85.4               |
| <i>Malus domestica</i>          | 66.3                                 | 82.5               |
| <i>Rosa rugosa</i>              | 66.7                                 | 83.3               |
| <i>Prunus domestica</i>         | 64.2                                 | 84.2               |
| <i>Fragaria ananassa</i>        | 60                                   | 78.8               |
| <i>Arabidopsis thaliana</i>     | 61.7                                 | 90.8               |
| <i>Brassica oleracea</i>        | 55.6                                 | 77.5               |
| <i>Brassica rapa</i>            | 58.5                                 | 84.6               |
| <i>Mesembryanthemum</i>         | 64.8                                 | 87.9               |
| <i>Medicago truncatula</i>      | 61.7                                 | 83.8               |
| <i>Lotus corniculatus</i>       | 61.9                                 | 82.5               |

*Cassandra* and 5S RNA comparisons. Pairwise comparisons between the 5S RNA regions of *Cassandra* (Table S2) and the corresponding 5S rRNA for these species. The similarity of the alignment over the entire length is lower than that over nucleotides 40–100 due to *Cassandra*- and species-specific segments at the 5' end of this region.

Table 4. *Cassandra* EST matches

| Query source                  | EST source                     | Matches |    |      | Library types                                                                                                                                                                                                                                                  | Best e-value | Total EST accessions |
|-------------------------------|--------------------------------|---------|----|------|----------------------------------------------------------------------------------------------------------------------------------------------------------------------------------------------------------------------------------------------------------------|--------------|----------------------|
|                               |                                | LTR     | 5S | Core |                                                                                                                                                                                                                                                                |              |                      |
| <i>Amblyopyrum muticum</i>    | <i>Hordeum vulgare</i>         | 9       | 9  | 1    | Adult top leaves, seedling shoot (dehydration stress), embryo + scutellum, callus, leaf epidermis, adult top leaves                                                                                                                                            | 8 E-05       | 461874               |
|                               | <i>Triticum aestivum</i>       |         |    | 6    | Late flowering spikelet, shoot grown with desiccation, grain, embryos 14 DAP, developing inflorescence, infected leaf                                                                                                                                          | 5 E-06       | 1049875              |
| <i>Avena sativa</i>           | <i>Eragrostis tef</i>          |         |    | 1    | 3-week old seedling                                                                                                                                                                                                                                            | 4 E-05       | 2816                 |
|                               | <i>Hordeum vulgare</i>         |         |    | 1    | Leaf epidermis                                                                                                                                                                                                                                                 | 1 E-05       | 547805               |
|                               | <i>Oryza sativa (indica)</i>   |         |    | 3    | Whole-life-cycle cDNA library, infected leaf                                                                                                                                                                                                                   | 5 E-06       | 172331               |
|                               | <i>Oryza sativa (japonica)</i> |         |    | 11   | 3rd week immature panicle, 100 ppm ZnSO <sub>4</sub> stressed callus, stressed seedling, 100 ppm ZnSO <sub>4</sub> stressed callus, mixed callus and mixed shoot, infected leaf anther (2-nuclei stage), infected leaf, anther (2-nuclei stage), infected leaf | 5 E-06       | 977811               |
|                               | <i>Sorghum bicolor</i>         |         |    | 1    | Wounded leaves                                                                                                                                                                                                                                                 | 3 E-04       | 204308               |
| <i>Arabidopsis thaliana</i>   | <i>Triticum aestivum</i>       |         |    | 4    | Shoot with ABA treatment, infected seedling                                                                                                                                                                                                                    | 7 E-07       | 1049875              |
|                               | <i>Zea mays</i>                |         |    | 3    | Ear leaf                                                                                                                                                                                                                                                       | 4 E-05       | 1159264              |
|                               | <i>Arabidopsis thaliana</i>    |         |    | 3    | Pooled infected and stressed libraries                                                                                                                                                                                                                         | 2 E-08       | 1276692              |
|                               | <i>Raphanus sativus</i>        |         |    | 19   | Whole seedling (with 1 set of true leaves), buds, and anthers                                                                                                                                                                                                  | 1 E-09       | 17770                |
|                               | <i>Brassica oleracea</i>       |         |    | 1    | Whole seedling (with 1 set of true leaves), buds, and anthers                                                                                                                                                                                                  | 1 E-09       | 17770                |
| <i>Brassica rapa</i>          | <i>Brassica napus</i>          |         |    | 2    | Not specified                                                                                                                                                                                                                                                  | 2 E-05       | 567177               |
|                               | <i>Raphanus sativus</i>        |         |    | 1    | Whole seedling (with 1 set of true leaves), buds, and anthers                                                                                                                                                                                                  | 1 E-09       | 17770                |
| <i>Bromus sterilis</i>        | <i>Eragrostis tef</i>          |         |    | 1    | 3-week old seedling                                                                                                                                                                                                                                            | 9 E-09       | 2816                 |
|                               | <i>Hordeum vulgare</i>         |         |    | 1    | Leaf epidermis                                                                                                                                                                                                                                                 | 1 E-07       | 547805               |
|                               | <i>Oryza sativa (indica)</i>   |         |    | 1    | Whole-life-cycle cDNA library                                                                                                                                                                                                                                  | 8 E-05       | 172331               |
|                               | <i>Oryza sativa (japonica)</i> |         |    | 10   | 3rd week immature panicle, stressed seedling, 100 ppm ZnSO <sub>4</sub> stressed callus, mixed callus and mixed shoot, infected leaf                                                                                                                           | 8 E-05       | 977811               |
|                               | <i>Triticum aestivum</i>       |         |    | 2    | Shoot with ABA treatment, late flowering spikelet, root                                                                                                                                                                                                        | 3 E-05       | 1049875              |
| <i>Eremopyrum distans</i>     | <i>Zea mays</i>                |         |    | 1    | Vegetative Shoot Apical Meristem (SAM) and leaf primordia staged P1-P4, mixed (silks, husks, ears, pollen, shoot tips, leaf, root tips, whole seed, embryo)                                                                                                    | 8 E-05       | 1159264              |
|                               | <i>Hordeum vulgare</i>         |         |    | 8    | Adult top leaves, callus, leaf epidermis, Seedling shoot (dehydration stress), embryo + scutellum                                                                                                                                                              | 8 E-05       | 547805               |
| <i>Fragaria ananassa</i>      | <i>Triticum aestivum</i>       |         |    | 6    | Late flowering spikelet, shoot grown with desiccation, grain, embryos 14 DAP, developing inflorescence, infected leaf                                                                                                                                          | 5 E-06       | 1049875              |
|                               | <i>Fragaria vesca</i>          |         |    | 1    | Stressed seedlings                                                                                                                                                                                                                                             | 3 E-13       | 10945                |
| <i>Hordeum brachyantherum</i> | <i>Malus x domestica</i>       |         |    | 1    | Fruit (seeds removed)                                                                                                                                                                                                                                          | 8 E-04       | 255091               |
|                               | <i>Prunus persica</i>          |         |    | 6    | Shoot                                                                                                                                                                                                                                                          | 2 E-20       | 70972                |
|                               | <i>Hordeum vulgare</i>         |         |    | 7    | Seedling shoot (dehydration stress), embryo + scutellum, adult top leaves, callus                                                                                                                                                                              | 1 E-09       | 547805               |
| <i>Hordeum marinum</i>        | <i>Triticum aestivum</i>       |         |    | 1    | LATE flowering spikelet, infected seedling, root                                                                                                                                                                                                               | 8 E-05       | 1049875              |
|                               | <i>Hordeum vulgare</i>         |         |    | 4    | Adult top leaves, Seedling shoot (dehydration stress), embryo + scutellum, callus, leaf epidermis                                                                                                                                                              | 8 E-05       | 547805               |
|                               | <i>Triticum aestivum</i>       |         |    | 9    | Late flowering spikelet, shoot grown with desiccation, grain, embryos 14 DAP, developing inflorescence, infected leaf                                                                                                                                          | 5 E-06       | 1049875              |
| <i>Henrardia persica</i>      | <i>Hordeum vulgare</i>         |         |    | 6    | Seedling shoot (dehydration stress), embryo + scutellum, adult top leaves                                                                                                                                                                                      | 8 E-05       | 547805               |
|                               | <i>Triticum aestivum</i>       |         |    | 9    | Late flowering spikelet, shoot grown with desiccation, grain, embryos 14 DAP, developing inflorescence, infected leaf, shoot with ABA treatment                                                                                                                | 5 E-06       | 1049875              |
| <i>Hordeum vulgare</i>        | <i>Hordeum vulgare</i>         |         |    | 9    | Seedling shoot (dehydration stress), leaf (14 days old), leaf epidermis, embryo + scutellum, adult top leaves                                                                                                                                                  | 2 E-08       | 461874               |
|                               | <i>Triticum aestivum</i>       |         |    | 3    | Shoot with ABA treatment                                                                                                                                                                                                                                       | 7 E-04       | 1049875              |

| Query source                    | EST source                           | Matches               |         | Library types                                                                                                                                                                                                                                                                                                | Best e-value          | Total EST accessions |
|---------------------------------|--------------------------------------|-----------------------|---------|--------------------------------------------------------------------------------------------------------------------------------------------------------------------------------------------------------------------------------------------------------------------------------------------------------------|-----------------------|----------------------|
|                                 |                                      | LTR                   | 5S Core |                                                                                                                                                                                                                                                                                                              |                       |                      |
| <i>Oryza sativa</i>             | <i>Eragrostis tef</i>                |                       | 1       | 3-week old seedling                                                                                                                                                                                                                                                                                          | 2 E-32                | 2816                 |
|                                 | <i>Oryza sativa (indica)</i>         | 5                     | 4       | 1 Infected leaf, panicle, whole-life-cycle cDNA library                                                                                                                                                                                                                                                      | 3 E-13                | 172331               |
|                                 | <i>Oryza sativa (japonica)</i>       | 18                    | 21      | 6 3rd week immature panicle, stressed seedling, 100 ppm ZnSO <sub>4</sub> stressed callus, mixed callus and mixed shoot, gamma-irradiated(45Gy), 100 ppm ZnSO <sub>4</sub> stressed callus, leaf, anther (2-nuclei stage), mixed shoot, infected leaf, ABF3-overexpressing transgenic, UVB irradiated callus | 3 E-13                | 977811               |
|                                 | <i>Zea mays</i>                      |                       | 1       | 14 Vegetative Shoot Apical Meristem (SAM) and leaf primordia staged P1-P4, ear leaf, pericarp                                                                                                                                                                                                                | 3 E-04                | 1159264              |
| <i>Psathyrostachys fragilis</i> | <i>Hordeum vulgare</i>               | 8                     | 4       | 1 Seedling shoot (dehydration stress), callus, leaf epidermis, embryo + scutellum, adult top leaves, Late flowering spikelet                                                                                                                                                                                 | 3 E-13                | 547805               |
| <i>Phleum pratense</i>          | <i>Triticum aestivum</i>             |                       | 1       |                                                                                                                                                                                                                                                                                                              | 5 E-06                | 1049875              |
|                                 | <i>Oryza sativa (indica)</i>         | 7                     | 2       | 1 Whole-life-cycle cDNA library, infected leaf, panicle                                                                                                                                                                                                                                                      | 3 E-10                | 172331               |
|                                 | <i>Oryza sativa (japonica)</i>       |                       | 19      | 3rd week immature panicle, stressed seedling, 100 ppm ZnSO <sub>4</sub> stressed callus, mixed callus and mixed shoot, infected leaf, gamma-irradiated(45Gy), 100 ppm ZnSO <sub>4</sub> stressed callus, uninfected leaf, anther (2-nuclei stage), ABF3-overexpressing transgenic                            | 3 E-10                | 977811               |
|                                 | <i>Zea mays</i>                      |                       | 1       | 1 Vegetative Shoot Apical Meristem (SAM) and leaf primordia staged P1-P4                                                                                                                                                                                                                                     | 4 E-05                | 1159264              |
| <i>Peridictyon sanctum</i>      | <i>Eragrostis tef</i>                |                       | 1       | 1 3-week old seedling                                                                                                                                                                                                                                                                                        | 2 E-04                | 2816                 |
|                                 | <i>Hordeum vulgare</i>               |                       | 1       | 1 Leaf epidermis                                                                                                                                                                                                                                                                                             | 3 E-06                | 547805               |
|                                 | <i>Triticum aestivum</i>             | 2                     | 3       | 2 Infected seedling, root, late flowering spikelet                                                                                                                                                                                                                                                           | 3 E-07                | 1049875              |
|                                 | <i>Zea mays</i>                      |                       | 1       | 1 Vegetative Shoot Apical Meristem (SAM) and leaf primordia staged P1-P4                                                                                                                                                                                                                                     | 2 E-05                | 1159264              |
| <i>Rosa rugosa</i>              | <i>Malus x domestica</i>             | 16                    | 23      | Young root, young fruit, fruit (seeds removed), Partially senescing leaves, young fruit, young expanding leaf                                                                                                                                                                                                | 1 E-09                | 255091               |
|                                 | <i>Prunus dulcis</i>                 |                       | 1       | 1 Developing seed                                                                                                                                                                                                                                                                                            | 2 E-05                | 3864                 |
| <i>Spartina alterniflora</i>    | <i>Prunus persica</i>                | 4                     | 5       | 5 Shoot                                                                                                                                                                                                                                                                                                      | 5 E-09                | 70972                |
|                                 | <i>Eragrostis tef</i>                |                       | 1       | 1 3-week old seedling                                                                                                                                                                                                                                                                                        | 9 E-07                | 2816                 |
|                                 | <i>Hordeum vulgare</i>               |                       | 1       | 1 Leaf epidermis                                                                                                                                                                                                                                                                                             | 6 E-05                | 85931                |
|                                 | <i>Oryza sativa (indica)</i>         | 2                     |         | 2 Whole-life-cycle cDNA library, infected leaf                                                                                                                                                                                                                                                               | 5 E-06                | 172331               |
|                                 | <i>Oryza sativa (japonica)</i>       | 11                    | 4       | 4 3rd week immature panicle, stressed seedling, 100 ppm ZnSO <sub>4</sub> stressed callus, mixed callus and mixed shoot, infected leaf, 100 ppm ZnSO <sub>4</sub> stressed callus, anther (2-nuclei stage)                                                                                                   | 5 E-06                | 977811               |
|                                 | <i>Zea mays</i>                      |                       | 4       | 4 Apex, mixed (silks, husks, ears, pollen, shoot tips, leaf, root tips, whole seed, embryo), Vegetative Shoot Apical Meristem (SAM) and leaf primordia staged P1-P4                                                                                                                                          | 6 E-11                | 1159264              |
|                                 | <i>Sorghum bicolor</i>               | <i>Eragrostis tef</i> |         | 1                                                                                                                                                                                                                                                                                                            | 1 3-week old seedling | 1 E-11               |
|                                 | <i>Oryza sativa (indica)</i>         | 1                     | 1       | 1 Infected leaf                                                                                                                                                                                                                                                                                              | 8 E-05                | 172331               |
|                                 | <i>Oryza sativa (japonica)</i>       |                       | 5       | 5 Anther (2-nuclei stage), infected leaf                                                                                                                                                                                                                                                                     | 8 E-05                | 977811               |
|                                 | <i>Zea mays</i>                      |                       | 4       | 4 Mixed (silks, husks, ears, pollen, shoot tips, leaf, root tips, whole seed, embryo), ear leaf, apex                                                                                                                                                                                                        | 7 E-07                | 1159264              |
| <i>Secale cereale</i>           | <i>Hordeum vulgare</i>               | 9                     | 4       | 1 Seedling shoot (dehydration stress), callus, leaf epidermis, embryo + scutellum, adult top leaves                                                                                                                                                                                                          | 3 E-13                | 461874               |
| <i>Triticum durum</i>           | <i>Triticum aestivum</i>             |                       | 1       | 2 Late flowering spikelet, shoot with ABA treatment                                                                                                                                                                                                                                                          | 5 E-06                | 1049875              |
|                                 | <i>Hordeum vulgare</i>               | 8                     | 4       | 1 Seedling shoot (dehydration stress), leaf epidermis, embryo + scutellum, adult top leaves, callus                                                                                                                                                                                                          | 3 E-13                | 461874               |
| <i>Zea mays</i>                 | <i>Triticum aestivum</i>             |                       | 1       | 2 Late flowering spikelet, shoot with ABA treatment                                                                                                                                                                                                                                                          | 5 E-06                | 1049875              |
|                                 | <i>Eragrostis tef</i>                |                       | 2       | 2 3-week old seedling                                                                                                                                                                                                                                                                                        | 1 E-11                | 2816                 |
|                                 | <i>Hordeum vulgare</i>               |                       | 1       | 1 Leaf epidermis                                                                                                                                                                                                                                                                                             | 4 E-05                | 85931                |
|                                 | <i>Mesembryanthemum crystallinum</i> | 4                     |         | 4 Leaf                                                                                                                                                                                                                                                                                                       | 8 E-05                | 27348                |
|                                 | <i>Oryza sativa (japonica)</i>       |                       | 4       | 4 Anther (2-nuclei stage), infected leaf                                                                                                                                                                                                                                                                     | 3 E-06                | 977811               |
|                                 | <i>Zea mays</i>                      | 4                     | 7       | 29 Vegetative Shoot Apical Meristem (SAM) and leaf primordia staged P1-P4, shoot apical meristem, sperm, whole plant, apex, mixed (silks, husks, ears, pollen, shoot tips, leaf, root tips, whole seed, embryo)                                                                                              | 3 E-10                | 1159264              |

EST database matches to *Cassandra* 5S regions. The EST-other section of the GenBank DNA database was searched by BLASTN for matches to the LTRs, internal domains, and 5S RNA regions of *Cassandra*. Queries were made with sequenced *Cassandra* for which large-scale EST projects have deposited significant numbers

of accessions. The search strings consisted of the first 40 nt of the LTR, the first 40 nt of the 5S rRNA region, and the core domain. The first 40 nt of the 5S region differs from the cellular 5S rRNAs; a search with the region 40 to 120 nt could also match cellular 5S transcripts. The table shows the origin of the query sequences, the source of the matching ESTs, and the type of tissue from which the libraries containing matches were made. The total number of matches having scores below  $10^{-4}$  (indicating the probability of random occurrence at 1 in  $10^4$  sequences) is listed as well as the best scores for the matches above this limit.

<sup>a</sup>GenBank release of September 16, 2007.

<sup>b</sup>Accession no. AJ475506.



**Table 6.** *Cassandra* in the rice genome.

| Chromosome | Segment    | Total | Complete | Solo LTRs |
|------------|------------|-------|----------|-----------|
| 1          | Intergenic | 32    | 8        | 24        |
|            | Genic      | 7     | 2        | 5         |
|            | Cds        | 2     | 0        | 2         |
|            | Total      | 39    | 10       | 29        |
| 2          | Intergenic | 21    | 1        | 20        |
|            | Genic      | 4     | 2        | 2         |
|            | Cds        | 1     | 0        | 1         |
|            | Total      | 25    | 3        | 22        |
| 3          | Intergenic | 38    | 7        | 31        |
|            | Genic      | 11    | 8        | 3         |
|            | Cds        | 0     | 0        | 0         |
|            | Total      | 49    | 15       | 34        |
| 4          | Intergenic | 32    | 9        | 23        |
|            | Genic      | 7     | 2        | 5         |
|            | Cds        | 0     | 0        | 0         |
|            | Total      | 39    | 11       | 28        |
| 5          | Intergenic | 14    | 5        | 9         |
|            | Genic      | 1     | 0        | 1         |
|            | Cds        | 0     | 0        | 0         |
|            | Total      | 15    | 5        | 10        |
| 6          | Intergenic | 29    | 8        | 21        |
|            | Genic      | 3     | 1        | 2         |
|            | Cds        | 1     | 0        | 1         |
|            | Total      | 32    | 9        | 23        |
| 7          | Intergenic | 24    | 9        | 15        |
|            | Genic      | 6     | 0        | 6         |
|            | Cds        | 0     | 0        | 0         |
|            | Total      | 30    | 9        | 21        |
| 8          | Intergenic | 27    | 6        | 21        |
|            | Genic      | 3     | 0        | 3         |
|            | Cds        | 0     | 0        | 0         |
|            | Total      | 30    | 6        | 24        |
| 9          | Intergenic | 12    | 1        | 11        |
|            | Genic      | 1     | 0        | 1         |
|            | Cds        | 0     | 0        | 0         |
|            | Total      | 13    | 1        | 12        |
| 10         | Intergenic | 22    | 5        | 17        |
|            | Genic      | 6     | 1        | 5         |
|            | Cds        | 0     | 0        | 0         |
|            | Total      | 28    | 6        | 22        |
| 11         | Intergenic | 23    | 6        | 17        |
|            | Genic      | 5     | 1        | 4         |
|            | Cds        | 0     | 0        | 0         |
|            | Total      | 28    | 7        | 21        |
| 12         | Intergenic | 20    | 1        | 19        |
|            | Genic      | 4     | 1        | 3         |
|            | Cds        | 0     | 0        | 0         |
|            | Total      | 24    | 2        | 22        |
| All        | Intergenic | 294   | 66       | 228       |
|            | Genic      | 58    | 18       | 40        |
|            | Cds        | 4     | 0        | 4         |
|            | Total      | 352   | 84       | 268       |

*Cassandra* in the rice genome. Searches were carried out on the rice pseudomolecules and the compartments thereof, as annotated by TIGR. Complete elements refer to matches long enough to include two LTRs and an internal domain, and at least 500 nt, whereas solo LTRs are matches to LTR query sequences of >100 nt. Elements with additional, small insertions and deletions with respect to the consensus element are therefore included in each set. Alntergenic@ refers to areas between genic regions, Genic to gene sequences, including exons, introns, and upstream or downstream untranslated regions. The Cds regions are the protein-coding nucleotide sequence of the gene model used by the annotation system, and excludes introns and untranslated regions. The total number of *Cassandra* LTRs is the sum of twice the number of complete elements and the number of solo LTRs.
